# Supplementary material for: The key role of major and trace elements in the formation of five common urinary stones
Source: PubMed Central journal article supplement (PMC11138091; doi:10.1186/s12894-024-01498-5), 2024-05-30
Supplement: 12894_2024_1498_MOESM1_ESM.pdf [file 12894_2024_1498_MOESM1_ESM.pdf]

# Supplementary

## **The Key Role of Major and Trace Elements in the Formation of Five Common Urinary Stones**

Yu Tian<sup>1</sup>, Guilin Han<sup>2,3,\*</sup>, Shudong Zhang<sup>1,\*</sup>, Ziyang Ding<sup>2,3</sup>, Rui Qu<sup>2,3</sup>

<sup>1</sup> Department of Urology, Peking University Third Hospital, Beijing 100191, China; tianyu@bjmu.edu.cn (Y.T.); zhangshudong@bjmu.edu.cn (S.Z.).

<sup>2</sup> Institute of Earth Sciences, China University of Geosciences (Beijing), Beijing 100083, China; dingziyang@email.cugb.edu.cn (Z.D.); qurui@email.cugb.edu.cn (R.Q.).

<sup>3</sup> Frontiers Science Center for Deep-time Digital Earth, Institute of Earth Sciences, China University of Geosciences (Beijing), Beijing 100083, China.

\* Correspondence: E-mail: hanguilin@cugb.edu.cn (G. H). Tel.: +86-10-8232-3536. Add.: University of Geosciences (Beijing), No. 29 Xueyuan Road, Haidian District.

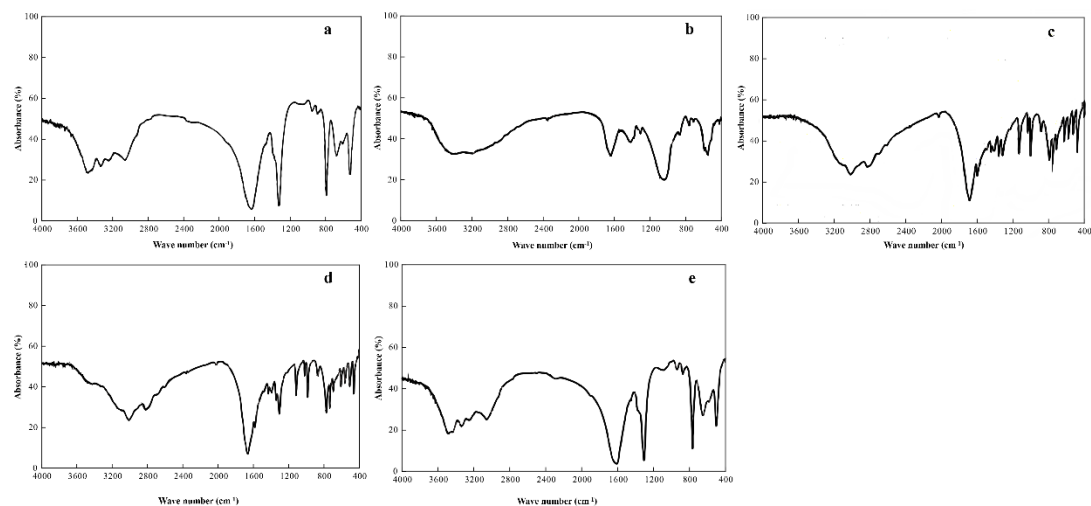

**Fig S1** Infrared spectra of typical urinary stones. a. CO; b. CA; c. UA; d. CO+UA; e. CO+CA

**Table S1.** Major and trace elements of all kidney stones

| NO | Gender | Age | Type | Type | Ca    | Mg   | Na      | K      | Sr     | Zn      | Li    | Ti       | Cu      | Se      | Rb     | Ba       | Pb       |
|----|--------|-----|------|------|-------|------|---------|--------|--------|---------|-------|----------|---------|---------|--------|----------|----------|
|    |        |     |      |      | %     | mg/g | µg/g    | µg/g   | µg/g   | µg/g    | µg/g  | µg/kg    | µg/k    | µg/kg   | µg/kg  | µg/kg    | µg/kg    |
| 1  | Female | 54  | COM  | COD  | 27.25 | 3.53 | 6496.24 | 903.47 | 209.65 | 520.36  | 21.87 | 16825.06 | 8733.04 | 219.38  | 211.16 | 4298.65  | 7835.61  |
| 2  | Male   | 61  | COM  | COD  | 26.82 | 0.40 | 1937.60 | 285.20 | 53.54  | 28.20   | 2.30  | 696.71   | 641.10  | 134.51  | 166.03 | 485.39   | 3392.99  |
| 3  | Female | 56  | COM  | COD  | 28.11 | 0.90 | 2828.01 | 324.83 | 141.55 | 396.65  | 1.92  | 2173.31  | 302.77  | 198.36  | 157.08 | 1821.39  | 5489.94  |
| 4  | Female | 61  | COM  | COD  | 27.23 | 3.75 | 3105.27 | 250.01 | 130.47 | 310.63  | 1.64  | 2743.71  | 603.10  | 105.75  | 173.34 | 1345.19  | 11331.28 |
| 5  | Male   | 41  | COM  | COD  | 28.69 | 0.78 | 1630.16 | 86.28  | 98.45  | 190.22  | 3.46  | 1403.41  | 230.32  | 49.20   | 35.80  | 2424.95  | 4478.75  |
| 6  | Male   | 61  | COM  | COD  | 27.84 | 1.27 | 3069.87 | 113.71 | 109.40 | 376.53  | 2.35  | 2436.32  | 1530.23 | 174.32  | 105.72 | 1041.56  | 22120.27 |
| 7  | Male   | 60  | COM  | COD  | 26.74 | 0.17 | 1492.93 | 202.52 | 146.22 | 79.01   | 5.18  | 4601.04  | 203.78  | 99.67   | 107.25 | 246.68   | 1358.50  |
| 8  | Male   | 40  | COM  | COD  | 28.40 | 0.38 | 1912.44 | 136.99 | 96.80  | 143.73  | 3.43  | 2836.75  | 462.15  | 190.44  | 83.92  | 1371.10  | 2346.23  |
| 9  | Male   | 50  | COM  | COD  | 27.30 | 0.32 | 1308.19 | 226.93 | 67.13  | 145.26  | 1.44  | 718.58   | 639.40  | 214.22  | 162.34 | 530.85   | 1233.49  |
| 10 | Male   | 41  | COM  | COD  | 27.17 | 0.36 | 1407.69 | 262.22 | 71.90  | 42.10   | 3.02  | 902.48   | 947.82  | 244.63  | 98.24  | 362.72   | 1391.50  |
| 11 | Male   | 67  | COM  | COD  | 27.04 | 1.32 | 2909.60 | 218.16 | 136.57 | 628.70  | 2.03  | 4635.38  | 213.55  | 75.90   | 129.81 | 12718.12 | 7658.03  |
| 12 | Female | 60  | COM  | COD  | 25.88 | 0.43 | 1662.99 | 251.71 | 101.55 | 20.32   | 0.84  | 764.79   | 565.38  | 2413.56 | 122.76 | 383.83   | 3502.05  |
| 13 | Male   | 68  | COM  | COD  | 28.38 | 1.26 | 2856.83 | 117.75 | 160.97 | 194.37  | 2.77  | 1500.59  | 329.83  | 32.90   | 94.00  | 1535.00  | 6391.77  |
| 14 | Male   | 57  | COM  | COD  | 30.63 | 3.99 | 6768.19 | 226.16 | 203.34 | 1230.65 | 2.92  | 11452.14 | 896.24  | 116.12  | 105.48 | 5434.30  | 13917.92 |

|    |        |    |     |     |       |       |          |         |        |         |         |          |         |        |         |          |          |
|----|--------|----|-----|-----|-------|-------|----------|---------|--------|---------|---------|----------|---------|--------|---------|----------|----------|
| 15 | Male   | 46 | COM |     | 29.02 | 1.25  | 5238.64  | 46.32   | 129.50 | 693.84  | 13.04   | 1560.35  | 1016.25 | 225.45 | -       | 1614.31  | 22451.95 |
| 16 | Female | 61 | COM | COD | 27.56 | 2.88  | 4675.52  | 161.56  | 179.36 | 254.82  | 2.77    | 3227.65  | 388.98  | 172.29 | 606.81  | 7667.19  | 16008.61 |
| 17 | Female | 69 | COM |     | 28.10 | 1.75  | 3581.90  | 264.86  | 150.69 | 966.09  | 3.44    | 2220.02  | 271.73  | 173.23 | 154.66  | 2226.47  | 9533.11  |
| 18 | Male   | 72 | COM |     | 26.13 | 0.51  | 1892.90  | 253.16  | 44.86  | 34.81   | 1.60    | -        | 582.90  | 334.99 | 107.19  | 51.38    | 1065.79  |
| 19 | Male   | 35 | COM |     | 25.19 | 0.41  | 881.79   | 38.02   | 82.34  | 510.08  | 5.23    | 3360.30  | 4124.25 | 160.22 | 91.89   | 16385.29 | 3046.79  |
| 20 | Male   | 72 | COM | COM | 29.61 | 1.81  | 5634.30  | 290.56  | 304.57 | 880.96  | 3.24    | 3183.20  | 393.19  | 299.13 | 79.69   | 9388.46  | 12450.81 |
| 21 | Male   | 42 | COM |     | 26.63 | 0.45  | 1501.67  | 102.22  | 71.63  | 32.47   | 3.40    | 846.37   | 545.10  | 798.89 | 97.30   | 589.65   | 2104.21  |
| 22 | Male   | 40 | COM | COD | 25.56 | 1.50  | 1953.81  | 284.83  | 101.63 | 142.84  | 1.81    | 3263.90  | 279.68  | 80.90  | 144.37  | 3601.90  | 3052.73  |
| 23 | Male   | 77 | COM |     | 32.58 | 10.03 | 9444.50  | 553.09  | 315.45 | 1633.34 | 9.19    | 8508.54  | 3137.95 | 115.85 | 358.35  | 8421.30  | 45699.49 |
| 24 | Male   | 70 | COM |     | 25.43 | 0.25  | 1944.65  | 887.33  | 104.65 | 37.93   | 2.85    | 627.91   | 441.21  | 105.12 | 46.18   | 422.54   | 916.81   |
| 25 | Male   | 36 | COM | COD | 30.59 | 2.37  | 5398.65  | 972.20  | 170.18 | 1025.51 | 5.86    | 5673.44  | 791.39  | 242.58 | 258.30  | 5515.89  | 19385.32 |
| 26 | Male   | 28 | COM |     | 29.41 | 4.32  | 6848.25  | 1062.91 | 233.51 | 1291.18 | 2.14    | 10053.14 | 449.89  | 202.71 | 722.40  | 7495.98  | 8999.27  |
| 27 | Male   | 46 | COM |     | 30.25 | 2.87  | 3213.17  | 333.91  | 160.56 | 425.32  | 5.81    | 741.80   | 786.35  | 176.63 | 114.27  | 5895.65  | 8671.10  |
| 28 | Male   | 29 | COM |     | 32.13 | 2.08  | 4820.25  | 815.89  | 237.22 | 1138.97 | 11.98   | 5015.93  | 231.63  | 199.59 | 415.33  | 12579.77 | 8642.10  |
| 29 | Male   | 41 | COM |     | 30.92 | 2.62  | 4836.51  | 498.99  | 252.95 | 730.89  | 9.02    | 38962.76 | 309.80  | 118.58 | 330.86  | 4475.57  | 13309.42 |
| 30 | Female | 42 | COM |     | 26.33 | 0.40  | 1955.85  | 323.16  | 59.49  | 38.61   | 2.23    | 908.84   | 672.42  | 222.29 | 149.68  | 579.54   | 1963.53  |
| 31 | Male   | 52 | COM |     | 27.57 | 1.17  | 2403.60  | 116.43  | 177.78 | 528.53  | 2.26    | 2496.74  | 253.24  | 169.56 | 56.76   | 6908.06  | 7064.52  |
| 32 | Male   | 48 | COM |     | 27.02 | 0.73  | 2367.80  | 54.99   | 82.87  | 196.61  | 2.30    | 1463.07  | 337.93  | 412.31 | 76.80   | 587.53   | 4919.16  |
| 33 | Female | 58 | COM | COD | 31.74 | 1.93  | 6034.44  | 746.98  | 139.70 | 521.35  | 13.92   | 28184.73 | 288.04  | 279.51 | 465.66  | 3370.75  | 5544.77  |
| 34 | Male   | 58 | COM | COD | 27.69 | 0.19  | 1114.42  | 1.50    | 51.61  | 38.52   | 5.42    | 1250.92  | 820.85  | 280.18 | 39.27   | 357.14   | 2797.26  |
| 35 | Male   | 69 | COM |     | 26.98 | 8.25  | 9231.95  | 2687.67 | 401.64 | 1503.65 | 2.16    | 5848.24  | 1851.92 | 131.43 | 2979.65 | 7906.21  | 9698.32  |
| 36 | Male   | 41 | COM | COD | 26.68 | 0.63  | 1935.63  | 62.37   | 115.47 | 120.20  | 5.97    | 524.87   | 127.61  | 51.88  | 117.32  | 1650.76  | 2883.68  |
| 37 | Female | 62 | COM | COD | 27.40 | 1.49  | 2519.14  | 218.96  | 67.48  | 149.76  | 1.77    | 3053.63  | 277.41  | 31.59  | 126.71  | 2495.15  | 2182.80  |
| 38 | Male   | 54 | COM |     | 27.14 | 0.28  | 1677.72  | 2.26    | 55.55  | 19.86   | 4.68    | 1114.18  | 392.38  | 139.93 | 61.36   | 290.65   | 1530.78  |
| 39 | Male   | 73 | COM | COD | 26.13 | 0.53  | 1418.91  | 210.33  | 76.15  | 31.79   | 3.92    | 1176.79  | 633.03  | 382.37 | 257.00  | 416.61   | 1785.48  |
| 40 | Male   | 65 | COM |     | 26.56 | 0.24  | 1714.49  | 204.13  | 68.48  | 22.96   | 3.63    | 1312.46  | 625.10  | 138.45 | 68.74   | 242.52   | 1186.66  |
| 41 | Female | 69 | COM | COD | 26.77 | 0.73  | 2382.94  | 114.83  | 52.38  | 189.40  | 5.96    | 2765.03  | 289.65  | 86.29  | 110.93  | 825.81   | 1772.83  |
| 42 | Male   | 68 | COM | COD | 27.59 | 1.00  | 3802.27  | 250.60  | 129.38 | 641.98  | 1.67    | 24977.78 | 347.27  | 225.25 | 155.21  | 1693.12  | 2752.60  |
| 43 | Male   | 60 | COM | COD | 26.73 | 0.26  | 1688.24  | 173.95  | 80.52  | 101.59  | 1.60    | 5921.79  | 275.21  | 134.74 | 78.87   | 456.12   | 2350.08  |
| 44 | Male   | 60 | COM | COD | 26.84 | 0.25  | 1418.84  | 213.50  | 69.85  | 23.00   | 2.05    | 5481.46  | 521.54  | 337.05 | 126.67  | 281.64   | 1505.88  |
| 45 | Male   | 53 | COM | COD | 25.42 | 0.62  | 1431.44  | 307.19  | 86.17  | 50.04   | 1.73    | 2631.18  | 413.85  | 163.86 | 201.25  | 303.97   | 4248.94  |
| 46 | Male   | 79 | COM | COD | 22.70 | 29.62 | 7820.98  | 679.10  | 295.63 | 208.98  | 2.79    | 7318.63  | 264.46  | 35.95  | 2205.42 | 5812.91  | 6799.01  |
| 47 | Male   | 35 | COM | COD | 27.78 | 4.58  | 4701.32  | 572.28  | 229.21 | 494.76  | 2.63    | 3633.00  | 415.26  | 168.03 | 419.52  | 3226.26  | 5832.82  |
| 48 | Female | 62 | COM |     | 25.89 | 0.29  | 1433.65  | 326.77  | 55.41  | 16.98   | 0.98    | 602.17   | 400.10  | 239.35 | 267.97  | 271.00   | 1825.02  |
| 49 | Male   | 67 | COM |     | 27.97 | 0.69  | 2107.55  | 201.04  | 66.72  | 136.64  | 1.66    | 2237.90  | 474.42  | 184.71 | 88.92   | 242.46   | 7686.83  |
| 50 | Male   | 37 | COM |     | 28.53 | 2.78  | 3679.15  | 530.88  | 165.13 | 742.46  | 2.38    | 5590.38  | 347.82  | 110.49 | 220.36  | 1319.28  | 12124.13 |
| 51 | Female | 60 | CA  |     | 21.34 | 46.62 | 9349.25  | 1685.78 | 455.57 | 909.62  | 3.37    | 4916.98  | 404.96  | 55.94  | 4645.48 | 4966.84  | 3036.40  |
| 52 | Male   | 73 | CA  |     | 18.28 | 44.48 | 9488.29  | 1762.03 | 248.97 | 668.72  | 2.95    | 7282.22  | 1406.44 | 36.49  | 6314.52 | 4951.72  | 3343.02  |
| 53 | Female | 50 | CA  |     | 17.04 | 51.06 | 7857.13  | 1101.80 | 177.60 | 569.65  | 1.90    | 6329.71  | 144.54  | 41.80  | 3979.58 | 6152.17  | 899.24   |
| 54 | Female | 68 | CA  |     | 18.53 | 49.70 | 13554.20 | 1857.09 | 211.05 | 742.33  | 2.90    | 4497.71  | 5731.02 | 235.04 | 7587.10 | 3121.94  | 2197.47  |
| 55 | Male   | 30 | CA  |     | 18.89 | 0.52  | 1436.26  | 129.13  | 84.24  | 285.15  | 1.75    | 6872.08  | 215.12  | 114.12 | 76.58   | 681.01   | 3247.81  |
| 56 | Female | 60 | CA  |     | 22.40 | 35.80 | 9223.80  | 1256.40 | 486.80 | 1093.90 | 1093.30 | 1677.80  | 1955.00 | 38.30  | 3284.80 | 5409.60  | 3794.70  |
| 57 | Male   | 64 | CA  |     | 27.40 | 13.20 | 727.80   | 252.90  | 269.90 | 900.20  | 352.90  | 1658.40  | 312.20  | 81.50  | 2622.00 | 3599.60  | 9108.60  |
| 58 | Male   | 57 | CA  |     | 10.40 | 60.20 | 6633.70  | 1171.60 | 229.00 | 5168.00 | 305.60  | 1750.00  | 598.20  | 31.80  | 7922.50 | 38978.00 | 4543.70  |

|    |        |       |         |     |       |       |         |         |        |        |        |         |         |         |         |         |          |
|----|--------|-------|---------|-----|-------|-------|---------|---------|--------|--------|--------|---------|---------|---------|---------|---------|----------|
| 59 | Male   | 73    | CA      |     | 16.30 | 42.60 | 9476.00 | 1745.50 | 232.10 | 555.60 | 773.30 | 1397.00 | 1425.70 | 18.80   | 5757.3  | 3465.40 | 30673.00 |
| 60 | Male   | 40    | UA      |     | 0.65  | 0.01  | 414.61  | 171.97  | 3.81   | 1.72   | 2.54   | -       | 2635.72 | 465.46  | 314.40  | -       | 98.76    |
| 61 | Male   | 61    | UA      |     | 0.10  | 0.05  | 833.55  | 221.79  | 2.69   | 1.84   | 2.15   | 954.93  | 5031.27 | 314.76  | 364.15  | 1.54    | 51.47    |
| 62 | Male   | 72    | UA      |     | 7.16  | 0.20  | 706.28  | 188.68  | 20.10  | 74.97  | 2.22   | 855.15  | 1734.75 | 295.26  | 344.66  | 1157.01 | 6537.03  |
| 63 | Male   | 43    | UA      |     | 5.67  | 0.07  | 781.76  | 156.72  | 22.06  | 5.77   | 2.05   | -       | 1185.06 | 499.40  | 266.67  | 93.52   | 523.12   |
| 64 | Male   | 60    | UA      |     | 0.07  | 0.03  | 801.87  | 258.47  | 1.83   | 1.03   | 1.32   | 19.74   | 2025.82 | 285.79  | 373.67  | 14.10   | 193.18   |
| 65 | Male   | 37    | UA      |     | 5.45  | 0.09  | 730.45  | 226.63  | 15.65  | 26.56  | 2.11   | 2662.07 | 1893.85 | 347.31  | 251.31  | 167.79  | 565.07   |
| 66 | Male   | 40    | UA      |     | 1.40  | -     | 483.80  | 26.80   | 2.30   | 1.30   | -      | 96.50   | 2813.00 | 637.20  | 2275.00 | -       | 211.4    |
| 67 | Male   | 58    | UA      |     | 0.60  | -     | 762.30  | 14.90   | 1.30   | 0.90   | -      | -       | 850.00  | 147.70  | 3243.00 | -       | 33.70    |
| 68 | Male   | 47.00 | CA      | COM | 29.89 | 3.03  | 6369.68 | 496.60  | 261.68 | 729.27 | 2.55   | 9124.86 | 399.70  | 219.74  | 327.03  | 6465.94 | 7397.29  |
| 69 | Male   | 45.00 | COM     | CA  | 25.36 | 0.29  | 1275.38 | 93.95   | 63.86  | 23.26  | 1.78   | 622.00  | 376.52  | 251.46  | 79.37   | 473.73  | 1907.84  |
| 70 | Female | 77    | COM     | CA  | 26.20 | 0.30  | 1599.00 | -       | 46.70  | 129.00 | 0.10   | 3954.00 | 8595.00 | 1438.00 | 74.80   | 1620.90 | 20458.00 |
| 71 | Male   | 47    | COM     | CA  | 28.40 | 2.50  | 5864.30 | 2978.00 | 248.70 | 616.80 | 451.20 | 9920.00 | 337.70  | 187.30  | 1712.00 | 4536.90 | 6743.00  |
| 72 | Male   | 66    | COM     | CA  | 25.40 | -     | 2292.60 | -       | 55.70  | 12.30  | -      | -       | 278.70  | 98.40   | 245.10  | -       | 672.10   |
| 73 | Male   | 75    | COM、COD | UA  | 6.90  | 0.06  | 784.43  | 259.78  | 15.79  | 4.70   | 2.35   | -       | 1791.47 | 549.93  | 369.95  | 28.33   | 433.09   |
| 74 | Male   | 39    | COM、COD | UA  | 12.92 | 0.13  | 1195.20 | 147.86  | 33.25  | 24.22  | 1.92   | 501.71  | 1895.33 | 247.37  | 257.49  | 205.73  | 1433.44  |
| 75 | Male   | 59    | COM、COD | UA  | 8.83  | 0.09  | 1737.32 | 238.45  | 15.65  | 8.15   | 1.65   | 357.27  | 2031.40 | 507.63  | 336.60  | 89.76   | 592.89   |
| 76 | Male   | 56    | COM     | UA  | 12.80 | 0.14  | 724.33  | 91.92   | 23.59  | 15.82  | 1.38   | 339.29  | 2355.01 | 296.57  | 267.33  | 73.86   | 611.86   |
| 77 | Male   | 42    | COM、COD | UA  | 13.11 | 0.28  | 1050.42 | 171.24  | 39.47  | 15.45  | 3.03   | 124.25  | 1896.18 | 224.89  | 178.55  | 289.23  | 714.20   |
| 78 | Male   | 53    | COM     | UA  | 23.88 | 0.46  | 1032.70 | 159.60  | 40.59  | 50.64  | 1.47   | 759.92  | 954.47  | 436.24  | 166.61  | 792.94  | 829.51   |
| 79 | Male   | 50    | COM     | UA  | 16.80 | 0.10  | 897.00  | -       | 44.50  | 16.50  | -      | 42.40   | 1690.70 | 258.10  | 143.60  | -       | 15975.00 |
| 80 | Male   | 75    | COM     | UA  | 6.80  | -     | 818.90  | 61.90   | 133.00 | 3.60   | -      | 52.20   | 2040.00 | 443.30  | 243.20  | -       | 420.00   |
